# Supplementary material
Source: PubMed Central journal article supplement (PMC8091547)

**Supplementary table 1. Sequence of epitope detection in multiplex immunofluorescence staining.**

| <b>Cell types to be detected</b> | <b>Target (Antibody clone)</b> | <b>Secondary antibody enzyme-conjugate</b> | <b>Opal fluorochrome</b> |
|----------------------------------|--------------------------------|--------------------------------------------|--------------------------|
| Melanocytes                      | Melan-A (A103)                 | Poly-HRP Ms + Rb                           | Opal 620                 |
| Keratinocytes                    | pan Cytokeratin (C11)          | Poly-HRP Ms + Rb                           | Opal 570                 |
| T cell subset                    | CD8 (C8/144B)                  | Poly-HRP Ms + Rb                           | Opal 520                 |
| Mast cells                       | Mast cell tryptase (AA1)       | Poly-HRP Ms + Rb                           | Opal 690                 |
| Leukocytes                       | CD45 (2B11+PD7/26)             | Poly-HRP Ms + Rb                           | Opal 480                 |
| T cells                          | CD3 (polyclonal)               | Poly-HRP Ms + Rb                           | Opal 780                 |
| Nuclear cells                    | DAPI                           |                                            |                          |

Abbreviations: Ms, mouse; Rb, rabbit; HRP, horseradish peroxidase.

**Supplementary figure 1.** Repetitive high-temperature heating leads to tissue damage, while tissues maintain their morphology after multiple rounds of treatment with stripping buffer. (A-C) On top is shown, hematoxylin and eosin staining of human kidney (A), melanoma (B), and colon (C) tissue prior to heat-induced epitope retrieval (HIER). At the bottom is shown, treatment of kidney (A), melanoma (B), and colon (C) tissue after 1 treatment (left) and 5 subsequent treatments (right) with either HIER in citrate buffer, HIER in Tris-EDTA buffer, or  $\beta$ -mercaptoethanol-containing stripping buffer. (D) Hematoxylin and eosin staining of gallbladder, ileum, pancreas, thymus and intestine tissue after 1 treatment (top), followed by 5 subsequent treatments with HIER in Tris-EDTA buffer (middle) or  $\beta$ -mercaptoethanol-containing stripping buffer (bottom). Bars equal 1 mm.

# Supplementary figure 1

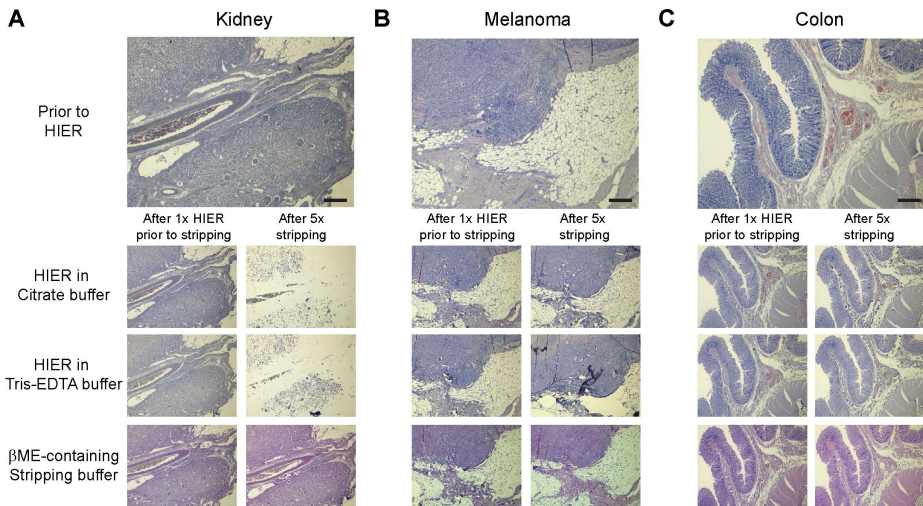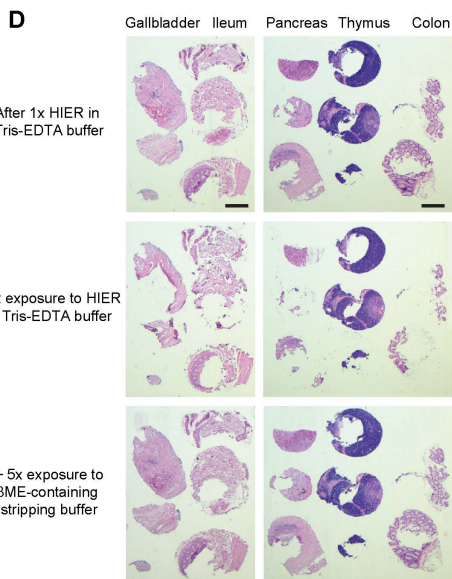

Supplement: sj-pdf-1-jhc-10.1369_00221554211007793.pdf [file sj-pdf-1-jhc-10.1369_00221554211007793.pdf]
